# Supplementary material
Source: publisher figshare collection journal article supplement (https://frontiersin.figshare.com/ndownloader/files/31343470)
Supplement: Supplementary file 1 [file 31343470]

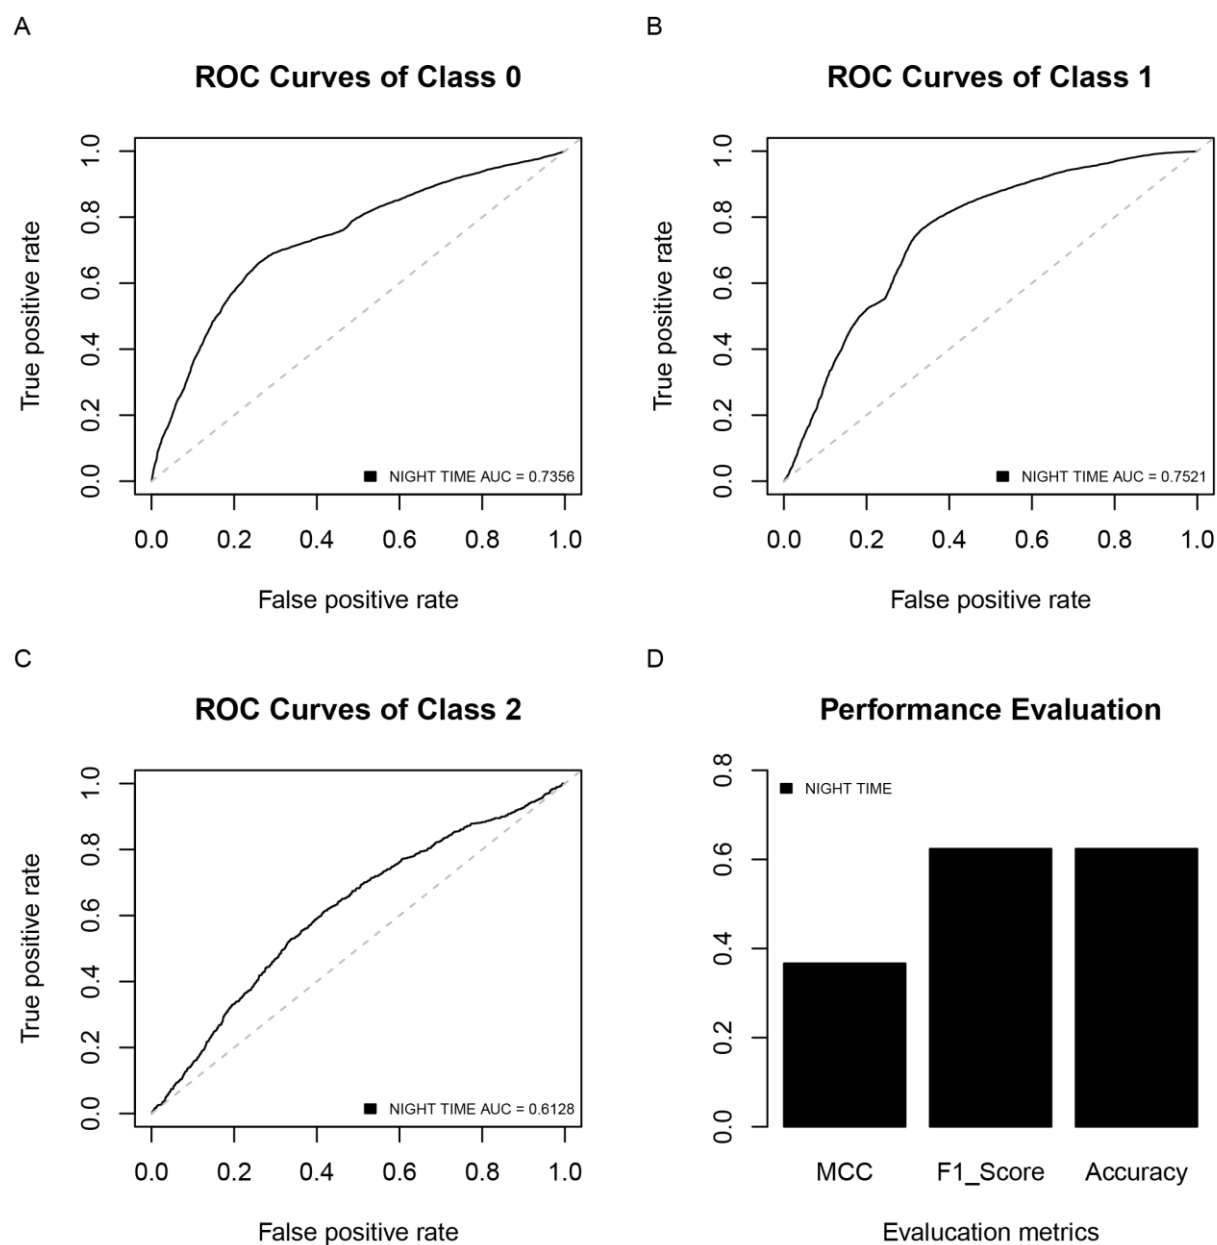

**Figure S2.** Receiver operating characteristic (ROC) curves demonstrating the performance of SeqNetQuake using nighttime data for A) class 0, B) class 1, and C) class 2. D) Bar plot curves of Matthews correlation coefficient (MCC), F1 score, and accuracy showing the model performance using nighttime data.
